# Supplementary material for: Combining traditional and novel techniques to increase our understanding of the lock-in depth of atmospheric gases in polar ice cores – results from the EastGRIP region
Source: Copernicus journal article supplement (doi:10.5194/tc-18-4379-2024), 2024-09-23
Supplement: Supplementary file 1 [file tc-18-4379-2024-supplement.pdf]

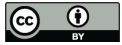

*Supplement of*

**Combining traditional and novel techniques to increase our understanding of the lock-in depth of atmospheric gases in polar ice cores – results from the EastGRIP region**

**Julien Westhoff et al.**

*Correspondence to:* Julien Westhoff ([julien.westhoff@nbi.ku.dk](mailto:julien.westhoff@nbi.ku.dk))

The copyright of individual parts of the supplement might differ from the article licence.

## 1 $\delta^{15}N$ isotopic ratios

Table 1: EGRIP firn air 2018, LSCE inert gas data (selected data only). Measured Oct 2019 on the Delta V by A. Orsi, without CO2 removal.

| Depth | d15N  |
|-------|-------|
| 5     | 0.094 |
| 11.78 | 0.113 |
| 17.91 | 0.073 |
| 33.01 | 0.170 |
| 43.44 | 0.245 |
| 48.2  | 0.248 |
| 54.07 | 0.277 |
| 57.65 | 0.287 |
| 59.18 | 0.288 |
| 60.88 | 0.298 |
| 62.92 | 0.294 |
| 64.22 | 0.288 |
| 65.84 | 0.281 |
| 66.61 | 0.266 |

## 2 $CO_2$ mixing ratios

Table 2: EGRIP firn air 2018,  $CO_2$  data. Correspondence: T. Blunier, University of Copenhagen, Denmark.

| Depth | CO2 |
|-------|-----|
| 5.12  | 403 |
| 7.83  | 403 |
| 11.78 | 402 |
| 17.91 | 400 |
| 23.25 | 399 |
| 28.05 | 397 |
| 33.01 | 396 |
| 38.04 | 395 |
| 43.44 | 394 |
| 48.2  | 393 |
| 51.8  | 392 |
| 54.07 | 392 |
| 55.75 | 392 |
| 57.65 | 389 |
| 59.18 | 384 |
| 60.86 | 373 |
| 62.92 | 359 |
| 64.22 | 348 |
| 65.84 | 337 |

### 3 $CH_4$ mixing ratios

Table 3: EGRIP 2018 CH<sub>4</sub>. Measured at IGE by OF-CEAS 08-10/01/2019. Referenced to NOAA standards. StDev is the uncertainty on experimental data. Correspondance: xavier.fain@univ-grenoble-alpes.fr.

| Depth | CH <sub>4</sub> IGE | StDev | tot uncertainty |
|-------|---------------------|-------|-----------------|
| 00.00 | 1919.7              | 1.9   | 15.500          |
| 05.00 | 1934.6              | 2.1   | 16.048          |
| 07.83 | 1935.2              | 2.0   | 16.081          |
| 11.78 | 1936.2              | 2.1   | 15.945          |
| 17.91 | 1931.2              | 2.5   | 15.724          |
| 23.25 | 1930.1              | 2.1   | 15.539          |
| 28.05 | 1928.8              | 2.3   | 15.526          |
| 33.01 | 1922.9              | 2.1   | 15.483          |
| 38.04 | 1919.6              | 1.9   | 15.462          |
| 43.44 | 1915.3              | 2.1   | 15.450          |
| 48.20 | 1910.8              | 1.9   | 15.422          |
| 51.80 | 1908.0              | 2.2   | 15.430          |
| 54.07 | 1904.4              | 2.1   | 15.411          |
| 55.75 | 1902.7              | 1.7   | 15.400          |
| 57.65 | 1900.0              | 2.0   | 15.407          |
| 59.18 | 1885.9              | 1.9   | 15.448          |
| 60.86 | 1855.8              | 2.3   | 15.676          |
| 62.92 | 1816.2              | 1.6   | 16.605          |
| 64.22 | 1768.6              | 2.0   | 18.268          |
| 65.84 | 1657.1              | 1.8   | 22.220          |
| 66.61 | 1628.3              | 1.9   | 23.951          |

## 4 Python code for figure 4

The following code was used to make the plots in fig. 4. Minor adjustments were used to make the remaining figures, with the same underlying idea.

```
import cv2
import numpy as np
import matplotlib.pyplot as plt

path = "C:\\...\\pixelCount\\"
images = ["29.bmp", "71.bmp", "92.bmp", "104.bmp", "107.bmp", "122.bmp",
          "137.bmp", "149.bmp", "164.bmp", "179.bmp"]

for i in images:
    imageIn = i
    imagePath = f"{path}{imageIn}"
    image = cv2.imread(imagePath)
    imgGr = cv2.cvtColor(image, cv2.COLOR_BGR2GRAY)
    pix1 = int(186)
    # for full linescan images:
    #img = imgGr[int((2048/2)-pix1):int((2048/2)+pix1), ...
    ... int(3000):int(3000+(pix1*2))]
    # for images in figure:
    img = imgGr[3000:3372, 800:1172]

    cv2.imshow('image', img)
    cv2.waitKey(1000)
    cv2.destroyAllWindows()

    a = np.empty(51)
    a[:] = np.nan
    b = np.empty(51)
    b[:] = np.nan

    for x in range(0, 255, 5):
        x_write = str(x)
        number_of_pix = np.sum(img <= x)
        if x == 0:
            a[0] = number_of_pix
        else:
            pos = int(x/5)
            number_of_pixLow = np.sum(img <= x-5)
            number_of_pixIn = number_of_pix - number_of_pixLow
            a[pos] = number_of_pixIn
            b[pos] = int(x)
```

```
a[np.isnan(a)] = 0
b[np.isnan(b)] = 0
plt.plot(b, a)
plt.scatter(b, a)

plt.yscale('log')
#plt.ylim((150000))
plt.axis([0, 255, 1, 150000])
plt.xlabel('pixel value []')
plt.ylabel('count []')
plt.title('Pixel value distribution')
plt.show()
```
